# Supplementary material for: SDN2GO: An Integrated Deep Learning Model for Protein Function Prediction
Source: PubMed Central journal article supplement (PMC7201018; doi:10.3389/fbioe.2020.00391), 2020-04-29
Supplement: Image_1.pdf [file Image_1.pdf]

## Supplementary Material

### 1 SUPPLEMENTARY TABLES AND FIGURES

#### 1.1 Tables and Figures

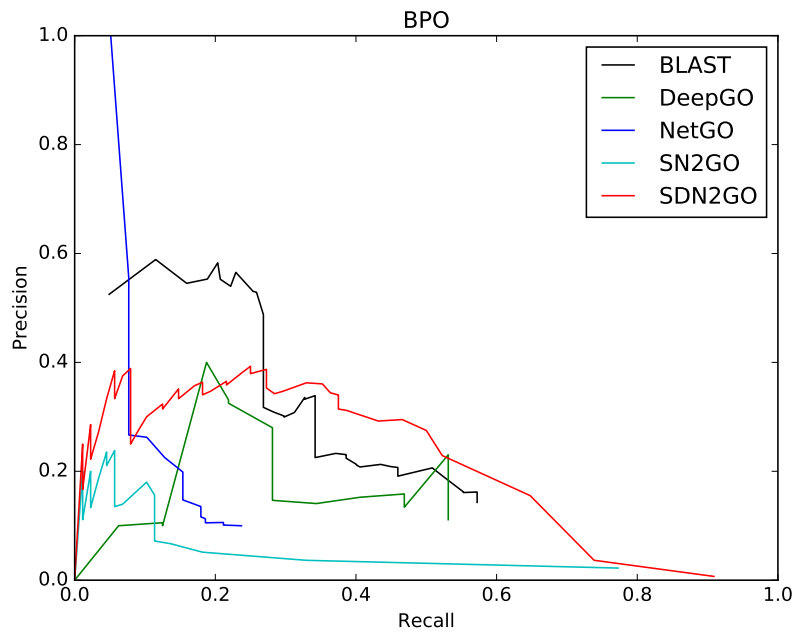

**Figure S1.** Precision-recall (P-R) curves of BLAST, DeepGO, NetGO, SN2GO, and SDN2GO. The performances of the five methods were evaluated on the independent testing set in BPO (Biological Process Ontology)

Table S1. Sequence sub-model hyperparameter adjustment results.

| learning rate | batch size | convergence epoch | loss   |
|---------------|------------|-------------------|--------|
| 0.01          | 8          | 17                | 0.0510 |
| 0.01          | 16         | 11                | 0.0482 |
| 0.01          | 32         | 28                | 0.0421 |
| 0.01          | 64         | 38                | 0.0443 |
| 0.01          | 128        | 40                | 0.0536 |
| 0.001         | 8          | 10                | 0.0362 |
| 0.001         | 16         | 10                | 0.0365 |
| 0.001         | 32         | 18                | 0.0395 |
| 0.001         | 64         | 20                | 0.0383 |
| 0.001         | 128        | 26                | 0.0407 |
| 0.0001        | 8          | 20                | 0.0376 |
| 0.0001        | 16         | 28                | 0.0416 |
| 0.0001        | 32         | 31                | 0.0419 |
| 0.0001        | 64         | 36                | 0.0383 |
| 0.0001        | 128        | 40                | 0.0403 |
| 0.00001       | 8          | 38                | 0.0408 |
| 0.00001       | 16         | 39                | 0.0417 |
| 0.00001       | 32         | 40                | 0.0442 |
| 0.00001       | 64         | 38                | 0.0482 |
| 0.00001       | 128        | 37                | 0.0477 |

Table S2. PPI Net sub-model hyperparameter adjustment results.

| learning rate | batch size | convergence epoch | loss   |
|---------------|------------|-------------------|--------|
| 0.01          | 8          | 55                | 1.0480 |
| 0.01          | 16         | 18                | 1.2462 |
| 0.01          | 32         | 1                 | 0.3400 |
| 0.01          | 64         | 1                 | 0.3220 |
| 0.01          | 128        | 2                 | 0.3290 |
| 0.001         | 8          | 25                | 0.1040 |
| 0.001         | 16         | 26                | 0.0475 |
| 0.001         | 32         | 24                | 0.0398 |
| 0.001         | 64         | 29                | 0.0338 |
| 0.001         | 128        | 30                | 0.0344 |
| 0.0001        | 8          | 30                | 0.0335 |
| 0.0001        | 16         | 24                | 0.0342 |
| 0.0001        | 32         | 21                | 0.0350 |
| 0.0001        | 64         | 30                | 0.0340 |
| 0.0001        | 128        | 30                | 0.0326 |
| 0.00001       | 8          | 52                | 0.0335 |
| 0.00001       | 16         | 53                | 0.0327 |
| 0.00001       | 32         | 58                | 0.0317 |
| 0.00001       | 64         | 58                | 0.0362 |
| 0.00001       | 128        | 59                | 0.0405 |
| 0.000001      | 8          | 59                | 0.0404 |
| 0.000001      | 16         | 60                | 0.0432 |
| 0.000001      | 32         | 60                | 0.0505 |
| 0.000001      | 64         | 60                | 0.0710 |
| 0.000001      | 128        | 49                | 0.3440 |

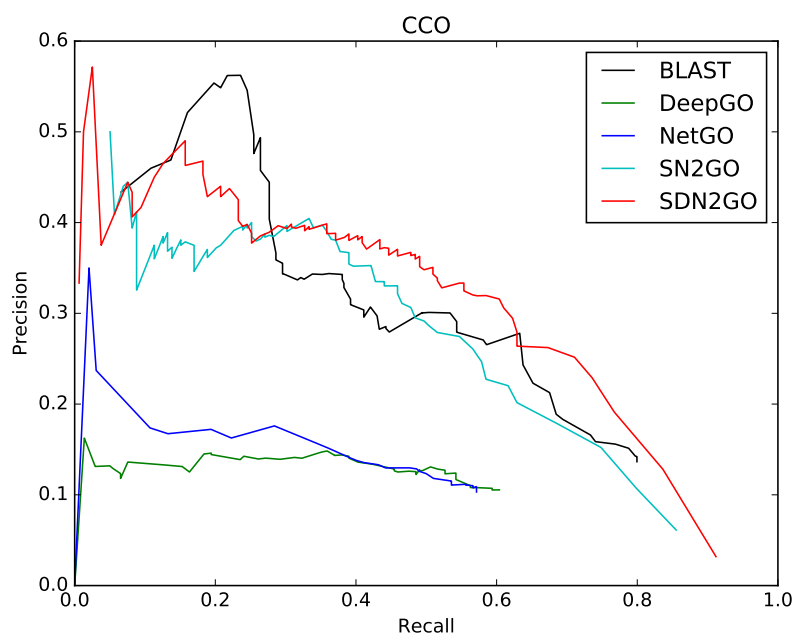

**Figure S2.** Precision-recall (P-R) curves of BLAST, DeepGO, NetGO, SN2GO, and SDN2GO. The performances of the five methods were evaluated on the independent testing set in CCO(Cellular Component Ontology)

**Table S3.** Domain sub-model hyperparameter adjustment results.

| learning rate | batch size | convergence epoch | loss   |
|---------------|------------|-------------------|--------|
| 0.01          | 8          | 97                | 0.0330 |
| 0.01          | 16         | 98                | 0.0292 |
| 0.01          | 32         | 100               | 0.0299 |
| 0.01          | 64         | 82                | 0.0286 |
| 0.01          | 128        | 60                | 0.0288 |
| 0.001         | 8          | 30                | 0.0267 |
| 0.001         | 16         | 21                | 0.0261 |
| 0.001         | 32         | 24                | 0.0267 |
| 0.001         | 64         | 37                | 0.0276 |
| 0.001         | 128        | 59                | 0.0297 |
| 0.0001        | 8          | 74                | 0.0290 |
| 0.0001        | 16         | 77                | 0.0279 |
| 0.0001        | 32         | 95                | 0.0286 |
| 0.0001        | 64         | 100               | 0.0277 |
| 0.0001        | 128        | 99                | 0.0332 |
| 0.00001       | 8          | 100               | 0.0316 |
| 0.00001       | 16         | 100               | 0.0378 |
| 0.00001       | 32         | 100               | 0.0431 |
| 0.00001       | 64         | 99                | 0.0431 |
| 0.00001       | 128        | 98                | 0.0472 |

**Table S4.** Weighted classifier hyperparameter adjustment results.

| learning rate | batch size | convergence epoch | loss   |
|---------------|------------|-------------------|--------|
| 0.01          | 8          | 23                | 0.0322 |
| 0.01          | 16         | 28                | 0.0314 |
| 0.01          | 32         | 29                | 0.0301 |
| 0.01          | 64         | 30                | 0.0302 |
| 0.001         | 8          | 54                | 0.0297 |
| 0.001         | 16         | 51                | 0.0289 |
| 0.001         | 32         | 51                | 0.0293 |
| 0.001         | 64         | 58                | 0.0293 |
| 0.0001        | 8          | 59                | 0.0300 |
| 0.0001        | 16         | 60                | 0.0305 |
| 0.0001        | 32         | 60                | 0.0325 |
| 0.0001        | 64         | 60                | 0.0378 |
